# Supplementary material for: Prevalence and Consequences of Preoperative Weight Loss in Gynecologic Surgery
Source: MDPI journal article supplement (doi:10.3390/nu11051094), 2019-05-17
Supplement: s1 [file s1]

Table S1: Surgical complexity scoring system based upon modified Aletti score

| Procedures                                                  | Points    |
|-------------------------------------------------------------|-----------|
| Total Hysterectomy or uni/bilateral oophorectomy            | 1         |
| Omentectomy                                                 | 1         |
| Pelvic lymphadenectomy                                      | 1         |
| Para-aortic lymphadenectomy                                 | 1         |
| Small bowel resection                                       | 1         |
| Large bowel resection                                       | 2         |
| Large bowel resection colo-colic anastomosis                | 2         |
| Large bowel resection, colo-rectal or colo-anal anastomosis | 3         |
| Splenectomy                                                 | 2         |
| Diaphragm stripping/resection                               | 2         |
| Urological diversion                                        | 2         |
| Liver resection                                             | 2         |
| <b>TOTAL</b>                                                | <b>20</b> |

**Table S1:** ponderation of 12 procedures with individual weighting (max 18 points), allowing gradation for surgical complexity in two groups (low:  $\leq 3$  versus high:  $\geq 4$ ) derived from Aletti et al.
